# Supplementary material for: A novel catalyst derived from Co-ZIFs to grow N-doped carbon nanotubes for all-solid-state supercapacitors with high performance
Source: Royal Society of Chemistry journal article supplement (doi:10.1039/d3nr01411h), 2023-01-01
Supplement: d3nr01411h1.pdf [file d3nr01411h1.pdf]

## Supporting Information

### **A novel catalyst derived from Co-ZIFs to grow N-doped Carbon nanotubes for all-solid-state supercapacitors with high performance**

Yunlong Qi, Tian Lv\*, Zilin Chen, Yu Duan, Xiao Li, Weiyang Tang, Quanhui Sun,

Dongmei Zhai, Tao Chen\*

Shanghai Key Lab of Chemical Assessment and Sustainability, School of Chemical  
Science and Engineering, Tongji University, Shanghai 200092, China

---

\* Corresponding author.

*E-mail address:* 18012@tongji.edu.cn (T. Lv), tchen@tongji.edu.cn (T. Chen)

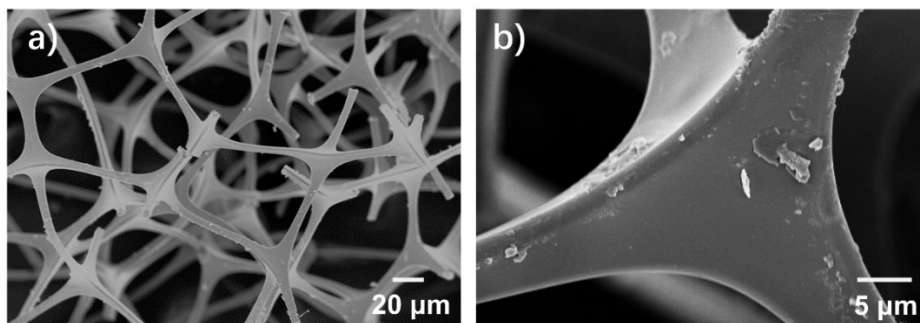

**Fig. S1.** FESEM images of MF with different magnifications.

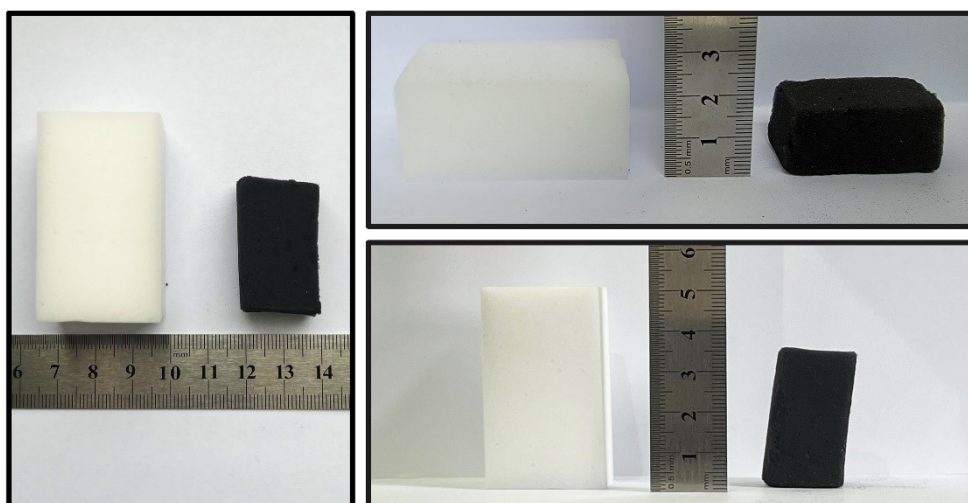

**Fig. S2.** Digital photographs of MF and CF from different views.

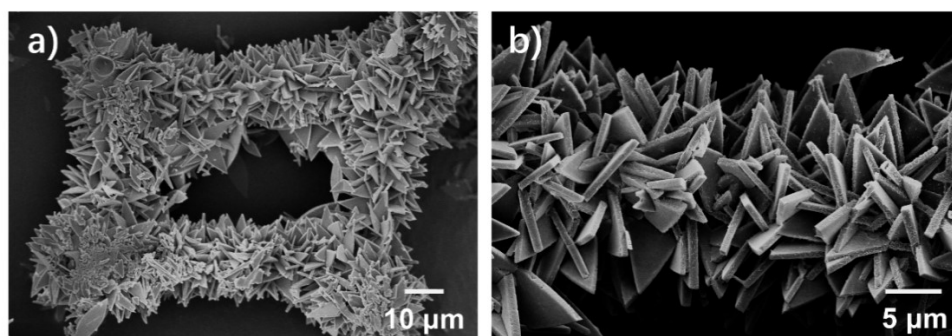

**Fig. S3.** FESEM images of ZIFs/CF hybrid with different magnifications.

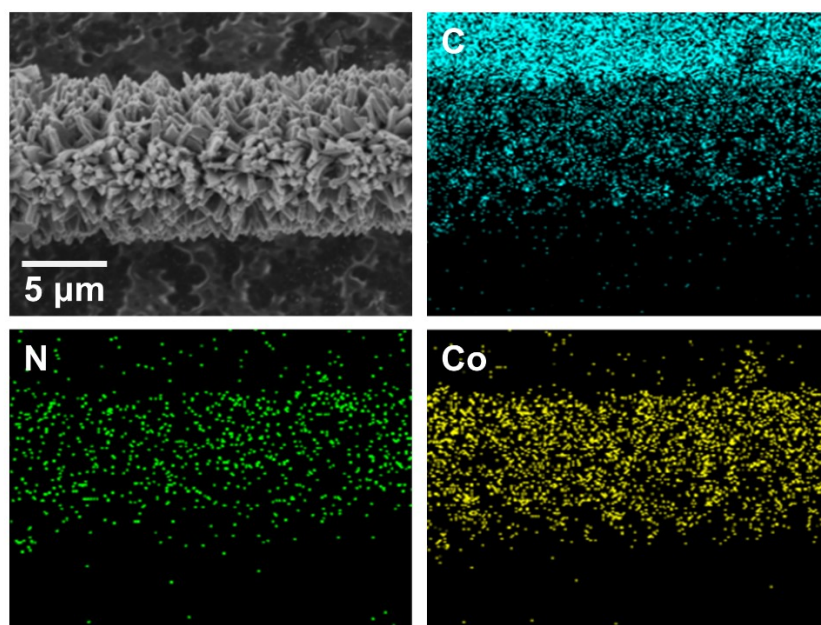

**Fig. S4.** EDX mapping of Co-ZIFs/CF hybrid.

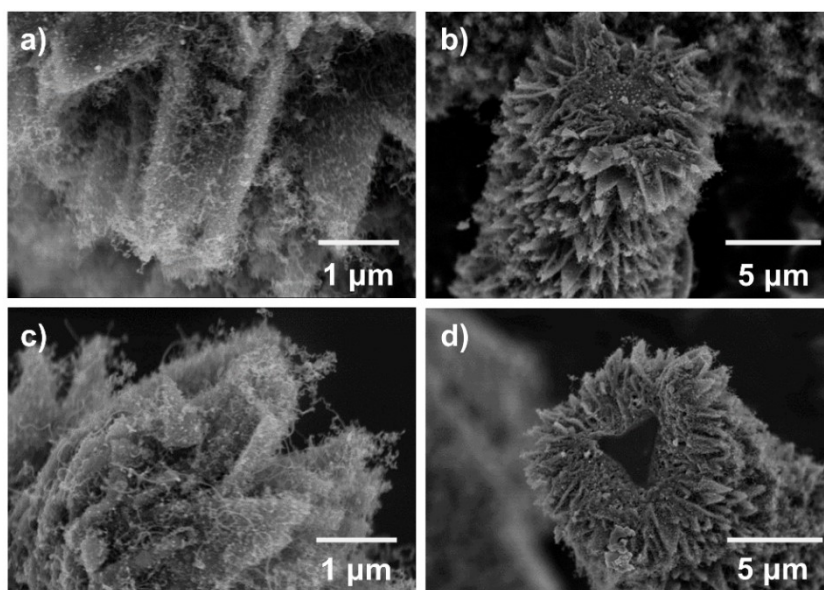

**Fig. S5.** FESEM images of CNTs/CF hybrids with different ratio of  $H_2$  and  $C_2H_4$ . (a, b) 2:1 and (c, d) 1:1.

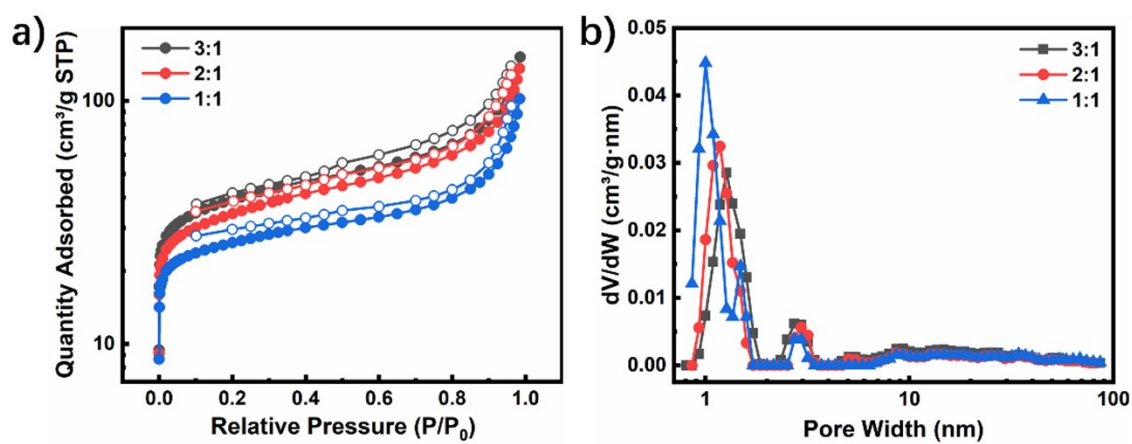

**Fig. S6.** (a)  $N_2$  adsorption-desorption isotherm at 77 K and (b) pore size distribution of CNTs/CF hybrids with different ratio of  $H_2$  and  $C_2H_4$ .

**Table S1** Main Structural Properties Calculated from N<sub>2</sub> Adsorption-Desorption

Analysis of CNTs/CF hybrids with different ratio of H<sub>2</sub> and C<sub>2</sub>H<sub>4</sub>.

| Sample | S <sub>bct</sub> (m <sup>2</sup> /g) | Pore volume (cm <sup>3</sup> /g) | Pore Size (nm) |
|--------|--------------------------------------|----------------------------------|----------------|
| 3:1    | 141.1                                | 0.208                            | 9.97           |
| 2:1    | 122.4                                | 0.189                            | 9.70           |
| 1:1    | 94.7                                 | 0.135                            | 12.51          |

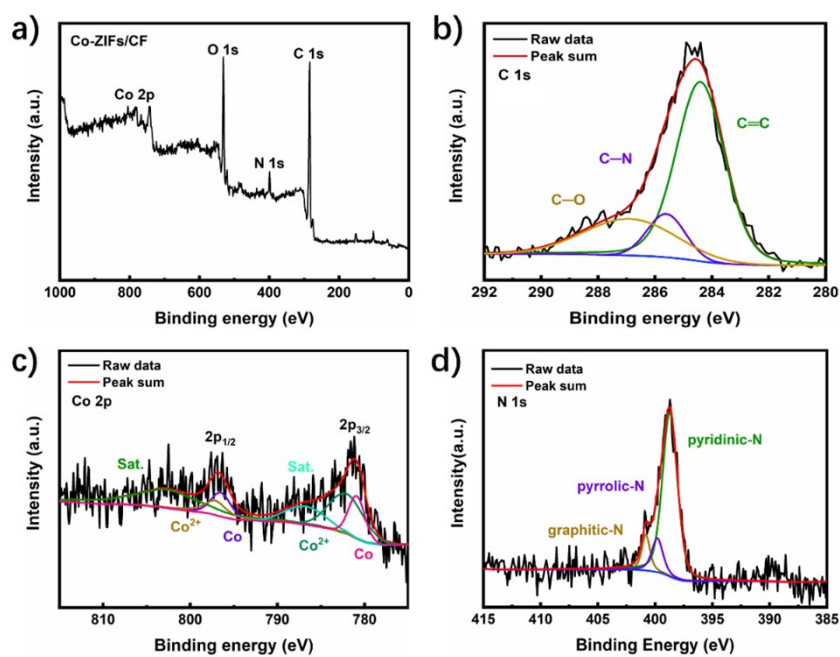

**Fig. S7.** (a) XPS and high-resolution (b) C 1s, (c) Co 2p and (d) N 1s of Co-ZIFs/CF hybrid.

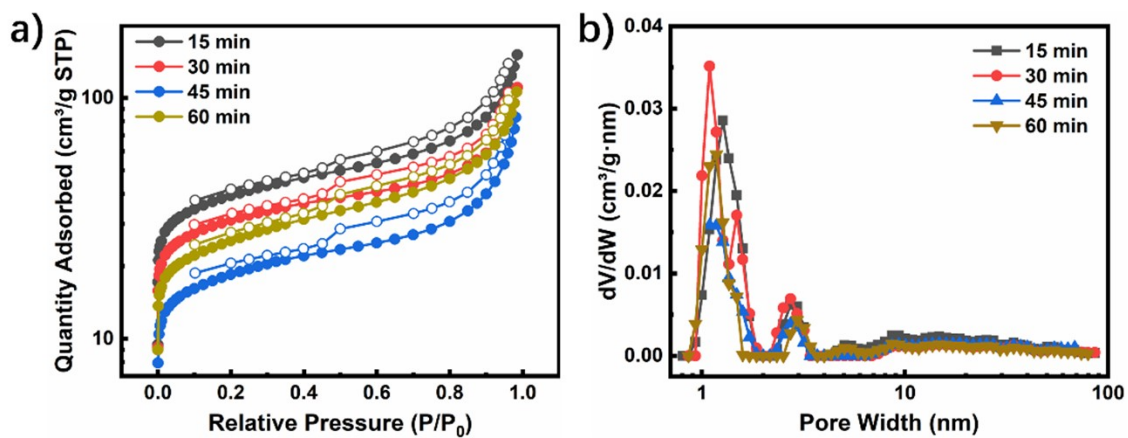

**Fig. S8.** (a) N<sub>2</sub> adsorption-desorption isotherm at 77 K and (b) pore size distribution of CNTs/CF hybrids with different growth time.

**Table S2** Main Structural Properties Calculated from N<sub>2</sub> Adsorption-Desorption Analysis of CNTs/CF hybrids with different growth time.

| Sample | $S_{\text{bet}}$ (m <sup>2</sup> /g) | Pore volume (cm <sup>3</sup> /g) | Pore Size (nm) |
|--------|--------------------------------------|----------------------------------|----------------|
| 15 min | 141.1                                | 0.208                            | 9.97           |
| 30 min | 111.6                                | 0.148                            | 9.77           |
| 45 min | 66.3                                 | 0.117                            | 11.59          |
| 60 min | 102.1                                | 0.150                            | 9.63           |

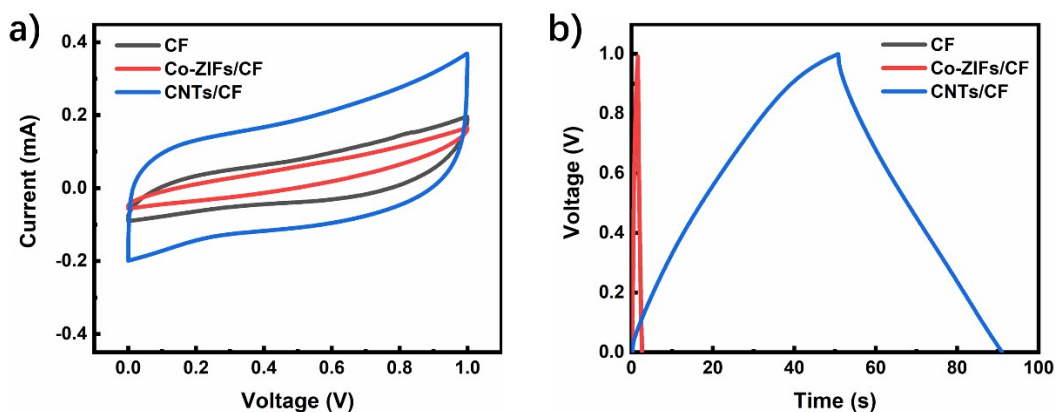

**Fig. S9.** (a) CV curves (at 20 mV/s) and (b) GCD curves (at a current density of 0.5 mA/cm<sup>2</sup>) of the supercapacitors based on CF, Co-ZIFs/CF and CNTs/CF.

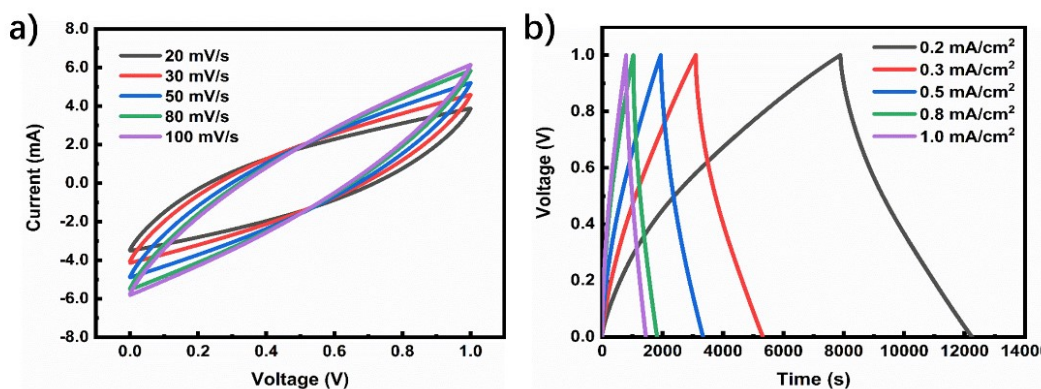

**Fig. S10.** (a) CV curves (at 20, 30, 50, 80 and 100 mV/s) and (b) GCD curves (at a current density of 0.2, 0.3, 0.5, 0.8 and 1.0 mA/cm<sup>2</sup>) of the supercapacitor based on MnO<sub>2</sub>/CNTs/CF hybrid with the MnO<sub>2</sub> deposition time for 35 min.

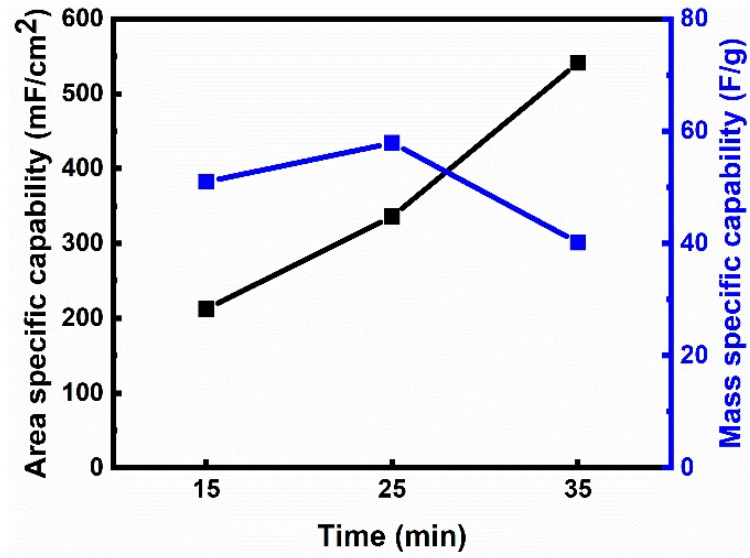

**Fig. S11.** Dependence of the specific capacitances of the supercapacitor based on MnO<sub>2</sub>/CNTs/CF hybrid with different deposition time of MnO<sub>2</sub> at a charge-discharge current of 0.5 mA/cm<sup>2</sup>.
